# Supplementary material
Source: publisher figshare collection journal article supplement (https://springernature.figshare.com/ndownloader/files/13168862)

# Before

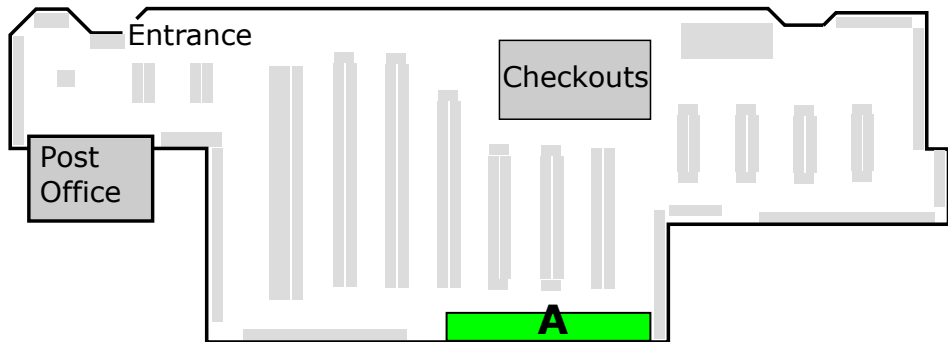

# After

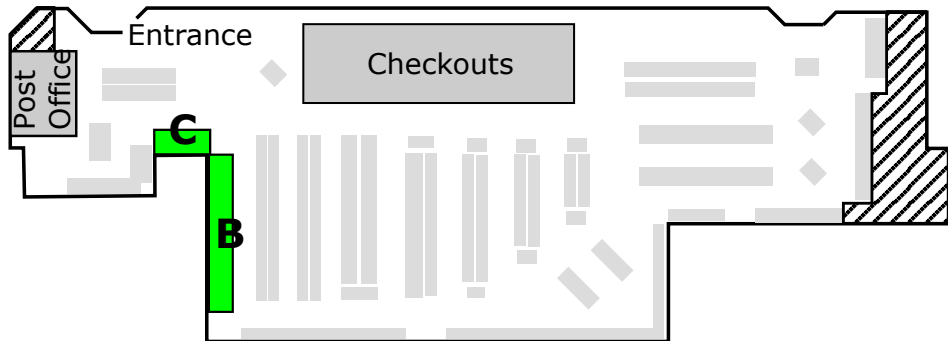

Supplement: Supplementary file [file 13168862]
